# Supplementary material
Source: publisher figshare collection journal article supplement (https://asha.figshare.com/articles/dataset/_/8121191)
Supplement: Supplementary file 1 [file 1]

**Supplemental Material S1.** Tables including fixed effects of generalized linear mixed-effects regression (GLMER) analyses.

**Fixed Effects**

GLMER = generalized linear mixed-effects regression; Est = estimated coefficients; SE = standard errors; CD = control deaf individuals without CIs and nonnative users of sign language; CI group = users of unilateral cochlear implants; LSE group = native users of Spanish Sign Language; RT = reaction time.

**EXPERIMENT 1**

**Magnified Condition:**

*Eye Movements*

**Table 1s.** Magnified condition as reference level.

*Fixed effects of GLMER model with all participants, magnified and baseline conditions and lipreading, working memory and nonverbal IQ as predictors of fixations.*

| Parameter                           | Est.  | SE  | z-value | p-value |
|-------------------------------------|-------|-----|---------|---------|
| Intercept                           | 1.69  | .23 | 7.18    | < .001  |
| Baseline condition                  | 0.46  | .10 | 4.72    | < .001  |
| Lipreading                          | 0.45  | .24 | 1.88    | .06     |
| Nonverbal IQ                        | 0.19  | .23 | 0.85    | .39     |
| Working memory                      | -0.05 | .24 | -0.22   | .83     |
| Baseline condition × Lipreading     | -0.28 | .11 | -2.53   | < .05   |
| Baseline condition × Working memory | -0.36 | .10 | -3.60   | < .001  |

All participants = 36.

*Note.* Formula: fixation ~ conditions × lipreading + condition × working memory + nonverbal IQ + (1 | subjects) + (1 | items).

**Table 2s.** Magnified condition and CD group as reference levels.

*Fixed effects of GLMER model with all groups, magnified and baseline conditions and lipreading as predictors of fixations.*

| Parameter                       | Est.  | SE  | z-value | p-value |
|---------------------------------|-------|-----|---------|---------|
| Intercept                       | 2.22  | .39 | 5.59    | < .001  |
| CI group                        | -0.95 | .54 | -1.77   | .08     |
| LSE group                       | -0.59 | .56 | -1.06   | .29     |
| Baseline condition              | -0.16 | .17 | -.97    | .34     |
| Lipreading                      | 0.48  | .22 | 2.16    | < .05   |
| Baseline condition × CI group   | 0.52  | .23 | 2.29    | < .05   |
| Baseline condition × LSE group  | 1.56  | .27 | 5.81    | < .001  |
| Baseline condition × Lipreading | -0.48 | .11 | -4.54   | < .001  |

CI group = 13. CD group = 12. LSE group = 11.

*Note.* Formula: fixation ~ groups × conditions + conditions × lipreading + (1 | subjects) + (1 | items).

**Table 3s.** Magnified condition and CD group as reference levels.

*Fixed effects of GLMER model with all groups, magnified and baseline conditions and lipreading, working memory and nonverbal IQ as predictors of fixations.*

| Parameter                           | Est.  | SE  | z-value | p-value |
|-------------------------------------|-------|-----|---------|---------|
| Intercept                           | 2.29  | .40 | 5.77    | < .001  |
| CI group                            | -1.07 | .54 | -1.96   | .05     |
| LSE group                           | -0.62 | .56 | -1.11   | .27     |
| Baseline condition                  | -0.21 | .17 | -1.25   | .21     |
| Lipreading                          | 0.48  | .23 | 2.07    | < .05   |
| Nonverbal IQ                        | 0.26  | .22 | 1.15    | .25     |
| Working memory                      | 0.03  | .23 | 0.14    | .89     |
| Baseline condition × CI group       | 0.64  | .23 | 2.74    | < .01   |
| Baseline condition × LSE group      | 1.52  | .27 | 5.69    | < .001  |
| Baseline condition × Lipreading     | -0.33 | .11 | -2.94   | < .01   |
| Baseline condition × Working memory | -0.35 | .10 | -3.34   | < .001  |

CI group = 13. CD group = 12. LSE group = 11.

*Note.* Formula: fixation ~ groups × conditions + conditions × lipreading + nonverbal IQ + conditions × working memory + (1 | subjects) + (1 | items).

## Accuracy

**Table 4s.** Magnified condition as reference level.

*Fixed effects of GLMER model with all participants, magnified and baseline conditions and lipreading, working memory and nonverbal IQ as predictors of accuracy.*

| Parameter                           | Est. | SE  | z-value | p-value |
|-------------------------------------|------|-----|---------|---------|
| Intercept                           | 1.55 | .22 | 7.14    | < .001  |
| Baseline condition                  | 0.17 | .18 | 0.95    | .34     |
| Lipreading                          | 0.28 | .14 | 2.00    | < .05   |
| Nonverbal IQ                        | 0.02 | .16 | 0.15    | .88     |
| Working memory                      | 0.01 | .16 | 0.08    | .93     |
| Baseline condition × nonverbal IQ   | 0.33 | .19 | 1.74    | .08     |
| Baseline condition × working memory | 0.36 | .19 | 1.87    | .06     |

All participants = 36.

*Note.* Formula: accuracy ~ conditions + lipreading + condition × nonverbal IQ + condition × working memory + (1 | subjects) + (1 | items).

**Table 5s.** Magnified condition and CD group as reference levels.

*Fixed effects of GLMER model with all groups, magnified and baseline conditions and lipreading as predictors of accuracy.*

| Parameter          | Est.  | SE  | z-value | p-value |
|--------------------|-------|-----|---------|---------|
| Intercept          | 1.72  | .29 | 5.86    | < .001  |
| CI group           | -0.18 | .33 | -0.54   | .59     |
| LSE group          | -0.28 | .34 | -0.84   | .40     |
| Baseline condition | 0.11  | .18 | 0.62    | .54     |
| Lipreading         | 0.31  | .14 | 2.20    | < .05   |

CI group = 13. CD group = 12. LSE group = 11.

*Note.* Formula: accuracy ~ groups + conditions + lipreading + (1 | subjects) + (1 | items).

**Table 6s.** Magnified condition and CD group as reference levels.

*Fixed effects of GLMER model with all groups, magnified and baseline conditions and lipreading, nonverbal IQ and working memory as predictors of accuracy.*

| Parameter          | Est.  | SE  | z-value | p-value |
|--------------------|-------|-----|---------|---------|
| Intercept          | 1.78  | .28 | 6.30    | < .001  |
| CI group           | -0.32 | .31 | -1.02   | .31     |
| LSE group          | -0.33 | .32 | -1.04   | .30     |
| Baseline condition | 0.11  | .18 | 0.60    | .55     |
| Lipreading         | 0.26  | .14 | 1.93    | .05     |
| Nonverbal IQ       | 0.20  | .13 | 1.51    | .13     |
| Working memory     | 0.21  | .13 | 1.56    | .12     |

CI group = 13. CD group = 12. LSE group = 11.

*Note.* Formula: accuracy ~ groups + conditions + lipreading + nonverbal IQ + working memory + (1 | subjects) + (1 | items).

### Reaction Times

**Table 7s.** Magnified condition as reference level.

*Fixed effects of GLMER model with all participants, magnified and baseline conditions and lipreading, working memory and nonverbal IQ as predictors of reaction times (RTs).*

| Parameter          | Est.     | SE     | t-value |
|--------------------|----------|--------|---------|
| Intercept          | 2,493.78 | 207.27 | 12.03   |
| Baseline condition | 105.95   | 158.20 | 0.67    |
| Lipreading         | -171.94  | 193.82 | -0.89   |
| Nonverbal IQ       | 76.34    | 183.12 | 0.42    |
| Working memory     | 58.89    | 191.85 | 0.31    |

All participants = 36.

*Note.* Formula: RTs ~ conditions + lipreading + nonverbal IQ + working memory + (1 | subjects) + (1 | items).

**Table 8s.** Magnified condition and CD group as reference levels.

*Fixed effects of GLMER model with all groups, magnified and baseline conditions and lipreading, as predictors of reaction times (RTs).*

| Parameter                      | Est.    | SE    | t-value |
|--------------------------------|---------|-------|---------|
| Intercept                      | 2,376.3 | 337.0 | 7.05    |
| CI group                       | 171.1   | 470.8 | 0.36    |
| LSE group                      | 199.4   | 485.3 | 0.41    |
| Baseline condition             | 304.5   | 267.9 | 1.14    |
| Lipreading                     | -190.2  | 183.5 | -1.04   |
| Baseline condition × CI group  | 136.9   | 382.4 | 0.36    |
| Baseline condition × LSE group | -803.4  | 392.1 | -2.05   |

CI group = 13. CD group = 12. LSE group = 11.

*Note.* Formula: RTs ~ groups × conditions + lipreading + (1 | subjects) + (1 | items).

**Table 9s.** Magnified condition and CD group as reference levels.

*Fixed effects of GLMER model with all groups, magnified and baseline conditions and lipreading, nonverbal IQ and working memory as predictors of reaction times (RTs).*

| Parameter                      | Est.    | SE     | t-value |
|--------------------------------|---------|--------|---------|
| Intercept                      | 2398.05 | 351.43 | 6.82    |
| CI group                       | 128.16  | 500.77 | 0.26    |
| LSE group                      | 183.72  | 500.14 | 0.37    |
| Baseline condition             | 302.76  | 267.99 | 1.13    |
| Lipreading                     | -201.33 | 199.82 | -1.01   |
| Nonverbal IQ                   | 43.91   | 192.40 | 0.23    |
| Working memory                 | 54.45   | 197.63 | 0.28    |
| Baseline condition × CI group  | 138.87  | 382.48 | 0.36    |
| Baseline condition × LSE group | -802.56 | 392.18 | -2.05   |

CI group = 13. CD group = 12. LSE group = 11.

*Note.* Formula: RTs ~ groups × conditions + lipreading + nonverbal IQ + working memory + (1 | subjects) + (1 | items).

## Gaze Contingent Condition:

### Eye Movements

**Table 10s.** Gaze contingent condition as reference level.

*Fixed effects of GLMER model with all participants, gaze contingent and baseline conditions and lipreading, working memory and nonverbal IQ as predictors of fixations.*

| Parameter                           | Est.  | SE  | z-value | p-value |
|-------------------------------------|-------|-----|---------|---------|
| Intercept                           | 0.74  | .27 | 2.78    | < .01   |
| Baseline condition                  | 1.34  | .09 | 13.99   | < .001  |
| Lipreading                          | 0.26  | .26 | 0.99    | .32     |
| Nonverbal IQ                        | 0.01  | .26 | 0.01    | 1.00    |
| Working memory                      | 0.06  | .27 | 0.22    | .83     |
| Baseline condition × Nonverbal IQ   | 0.45  | .10 | 4.43    | < .001  |
| Baseline condition × Working memory | -0.42 | .09 | -4.70   | < .001  |

All participants = 36.

*Note.* Formula: fixation ~ conditions + lipreading + condition × nonverbal IQ + condition × working memory + (1 | subjects) + (1 | items).

**Table 11s.** Gaze contingent condition and CD group as reference levels.

*Fixed effects of GLMER model with all groups, gaze contingent and baseline conditions and lipreading as predictors of fixations.*

| Parameter                       | Est.  | SE  | z-value | p-value |
|---------------------------------|-------|-----|---------|---------|
| Intercept                       | 0.96  | .44 | 2.20    | < .05   |
| CI group                        | -0.48 | .60 | -0.80   | .42     |
| LSE group                       | -0.16 | .62 | -0.26   | .79     |
| Baseline condition              | 1.02  | .16 | 6.45    | < .001  |
| Lipreading                      | 0.31  | .24 | 1.27    | .20     |
| Baseline condition × CI group   | 0.03  | .22 | 0.14    | .89     |
| Baseline condition × LSE group  | 0.85  | .24 | 3.53    | < .001  |
| Baseline condition × Lipreading | -0.25 | .09 | -2.63   | < .01   |

CI group = 13. CD group = 12. LSE group = 11.

*Note.* Formula: fixation ~ groups × conditions + conditions × lipreading + (1 | subjects) + (1 | items).

**Table 12s.** Gaze contingent condition and CD group as reference levels.

*Fixed effects of GLMER model with all groups, gaze contingent and baseline conditions and lipreading, nonverbal IQ and working memory as predictors of fixations.*

| Parameter                           | Est.  | SE  | z-value | p-value |
|-------------------------------------|-------|-----|---------|---------|
| Intercept                           | 1.02  | .45 | 2.26    | < .05   |
| CI group                            | -0.56 | .62 | -0.90   | .37     |
| LSE group                           | -0.20 | .64 | -0.32   | .75     |
| Baseline condition                  | 1.07  | .16 | 6.53    | < .001  |
| Lipreading                          | 0.27  | .26 | 1.03    | .30     |
| Nonverbal IQ                        | 0.04  | .26 | 0.15    | .88     |
| Working memory                      | 0.10  | .27 | 0.37    | .71     |
| Baseline condition × CI group       | -0.01 | .22 | -0.01   | 1.00    |
| Baseline condition × LSE group      | 0.87  | .24 | 3.58    | < .001  |
| Baseline condition × Nonverbal IQ   | 0.50  | .10 | 4.83    | < .001  |
| Baseline condition × Working memory | -0.36 | .09 | -3.92   | < .001  |

CI group = 13. CD group = 12. LSE group = 11.

*Note.* Formula: fixation ~ groups × conditions + lipreading + conditions × nonverbal IQ + conditions × working memory + (1 | subjects) + (1 | items).

## Accuracy

**Table 13s.** Gaze contingent condition as reference level.

*Fixed effects of GLMER model with all participants, gaze contingent and baseline conditions and lipreading, nonverbal IQ and working memory as predictors of accuracy.*

| Parameter                           | Est.  | SE  | z-value | p-value |
|-------------------------------------|-------|-----|---------|---------|
| Intercept                           | 1.06  | .17 | 6.10    | < .001  |
| Baseline condition                  | 0.56  | .17 | 3.25    | < .01   |
| Lipreading                          | 0.22  | .13 | 1.65    | .09     |
| Nonverbal IQ                        | 0.19  | .12 | 1.52    | .13     |
| Working memory                      | -0.04 | .15 | -0.26   | .79     |
| Baseline condition × Working memory | 0.40  | .18 | 2.25    | < .05   |

All participants = 36.

*Note.* Formula: accuracy ~ conditions + lipreading + nonverbal IQ + condition × working memory + (1 | subjects) + (1 | items).

**Table 14s.** Gaze contingent condition and CD group as reference levels.  
Fixed effects of GLMER model with all groups, gaze contingent and baseline conditions and lipreading as predictors of accuracy.

| Parameter          | Est. | SE  | z-value | p-value |
|--------------------|------|-----|---------|---------|
| Intercept          | 0.98 | .25 | 3.92    | < .001  |
| CI group           | 0.23 | .31 | 0.74    | .46     |
| LSE group          | 0.00 | .32 | 0.01    | .99     |
| Baseline condition | 0.52 | .17 | 3.07    | < .01   |
| Lipreading         | 0.22 | .13 | 1.68    | .09     |

CI group = 13. CD group = 12. LSE group = 11.

Note. Formula: accuracy ~ groups + conditions + lipreading + (1 | subjects) + (1 | items).

**Table 15s.** Gaze contingent condition and CD group as reference levels.  
Fixed effects of GLMER model with all groups, gaze contingent and baseline conditions and lipreading, nonverbal IQ and working memory as predictors of accuracy.

| Parameter          | Est.  | SE  | z-value | p-value |
|--------------------|-------|-----|---------|---------|
| Intercept          | 1.03  | .24 | 4.24    | < .001  |
| CI group           | 0.11  | .30 | 0.38    | .70     |
| LSE group          | -0.03 | .30 | -0.09   | .93     |
| Baseline condition | 0.51  | .17 | 3.04    | < .01   |
| Lipreading         | 0.20  | .13 | 1.55    | .12     |
| Nonverbal IQ       | 0.18  | .12 | 1.48    | .14     |
| Working memory     | 0.13  | .13 | 1.01    | .31     |

CI group = 13. CD group = 12. LSE group = 11.

Note. Formula: accuracy ~ groups + conditions + lipreading + nonverbal IQ + working memory + (1 | subjects) + (1 | items).

## Reaction Times

**Table 16s.** Gaze contingent condition as reference level.  
Fixed effects of GLMER model with all participants, gaze contingent and baseline conditions and lipreading, working memory and nonverbal IQ as predictors of reaction times (RTs).

| Parameter          | Est.    | SE     | t-value |
|--------------------|---------|--------|---------|
| Intercept          | 3107.99 | 268.99 | 11.55   |
| Baseline condition | -555.44 | 194.98 | -2.85   |
| Lipreading         | -106.47 | 254.70 | -0.42   |
| Nonverbal IQ       | 10.34   | 237.12 | 0.04    |
| Working memory     | 161.52  | 250.24 | 0.64    |

All participants = 36.

Note. Formula: RTs ~ groups + conditions + lipreading + (1 | subjects) + (1 | items).

**Table 17s.** Gaze contingent condition and CD group as reference levels.

*Fixed effects of GLMER model with all groups, gaze contingent and baseline conditions and lipreading as predictors of reaction times (RTs).*

| Parameter          | Est.   | SE    | t-value |
|--------------------|--------|-------|---------|
| Intercept          | 3237.3 | 414.0 | 7.82    |
| CI group           | 174.1  | 554.6 | 0.31    |
| LSE group          | -625.6 | 570.5 | -1.10   |
| Baseline condition | -551.6 | 195.0 | -2.83   |
| Lipreading         | -110.7 | 237.6 | -0.47   |

CI group = 13. CD group = 12. LSE group = 11.

*Note.* Formula: RTs ~ groups + conditions + lipreading + (1 | subjects) + (1 | items).

**Table 18s.** Gaze contingent condition and CD group as reference levels.

*Fixed effects of GLMER model with all groups, gaze contingent and baseline conditions and lipreading, nonverbal IQ and working memory as predictors of reaction times (RTs).*

| Parameter          | Est.    | SE     | t-value |
|--------------------|---------|--------|---------|
| Intercept          | 3261.24 | 431.33 | 7.56    |
| CI group           | 139.11  | 591.59 | 0.23    |
| LSE group          | -656.24 | 588.20 | -1.12   |
| Baseline condition | -553.32 | 194.99 | -2.84   |
| Lipreading         | -163.96 | 257.52 | -0.64   |
| Nonverbal IQ       | -33.34  | 244.36 | -0.14   |
| Working memory     | 160.55  | 252.87 | 0.63    |

CI group = 13. CD group = 12. LSE group = 11.

*Note.* Formula: RTs ~ groups + conditions + lipreading + (1 | subjects) + (1 | items).

## EXPERIMENT 2

### Fixations

**Table 19s.** Mismatching condition as reference level.

*Fixed effects of GLMER model with all participants, mis/matching condition, lipreading, nonverbal IQ and working memory as predictors of fixations.*

| Parameter                           | Est.  | SE  | z-value | p-value |
|-------------------------------------|-------|-----|---------|---------|
| Intercept                           | 4.27  | .40 | 10.73   | < .001  |
| Matching condition                  | 0.74  | .35 | 2.10    | < .05   |
| Lipreading                          | 0.30  | .30 | 1.00    | .32     |
| Nonverbal IQ                        | -0.10 | .29 | -0.36   | .72     |
| Working memory                      | -0.37 | .32 | -1.15   | .25     |
| Matching condition × Working memory | 0.59  | .27 | 2.21    | < .05   |

All participants = 36.

*Note.* Formula: fixation ~ mis/matching conditions + lipreading + nonverbal IQ + mis/matching conditions × working memory + (1 | subjects) + (1 | items).

**Table 20s.** Mismatching condition and CD group as reference levels.

*Fixed effects of GLMER model with CI, CD, and LSE groups, mis/matching condition and lipreading as predictors of fixations.*

| Parameter          | Est.  | SE  | z-value | p-value |
|--------------------|-------|-----|---------|---------|
| Intercept          | 4.08  | .48 | 8.48    | < .001  |
| CI group           | -0.70 | .55 | -1.27   | .20     |
| LSE group          | 1.46  | .73 | 2.00    | < .05   |
| Matching condition | 0.68  | .34 | 1.98    | < .05   |
| Lipreading         | 0.29  | .24 | 1.20    | .23     |

CI group = 13. CD group = 12. LSE group = 11.

*Note.* Formula: fixation ~ groups + mis/matching conditions + lipreading + (1 | subjects) + (1 | items).

**Table 21s.** Mismatching condition and CD group as reference levels.

*Fixed effects of GLMER model with CI, CD, and LSE groups, mis/matching condition, lipreading and nonverbal IQ and working memory as predictors of fixations.*

| Parameter          | Est.  | SE  | z-value | p-value |
|--------------------|-------|-----|---------|---------|
| Intercept          | 4.08  | .48 | 8.46    | < .001  |
| CI group           | -0.71 | .56 | -1.25   | .21     |
| LSE group          | 1.48  | .73 | 2.02    | < .05   |
| Matching condition | 0.68  | .34 | 1.98    | < .05   |
| Lipreading         | 0.31  | .25 | 1.20    | .23     |
| Nonverbal IQ       | 0.07  | .26 | 0.26    | .79     |
| Working memory     | -0.04 | .27 | -0.16   | .87     |

CI group = 13. CD group = 12. LSE group = 11.

*Note.* Formula: fixation ~ groups + mis/matching conditions + lipreading + nonverbal IQ + working memory + (1 | subjects) + (1 | items).

## Accuracy

**Table 22s.** Mismatching condition as reference level.

*Fixed effects of GLMER model with all participants, mis/matching condition, lipreading, nonverbal IQ and working memory as predictors of accuracy.*

| Parameter                           | Est.  | SE  | z-value | p-value |
|-------------------------------------|-------|-----|---------|---------|
| Intercept                           | 0.93  | .49 | 1.91    | .06     |
| Matching condition                  | 5.99  | .77 | 7.81    | < .001  |
| Lipreading                          | 0.77  | .44 | 1.75    | .08     |
| Nonverbal IQ                        | -0.19 | .40 | -0.46   | .64     |
| Working memory                      | -0.17 | .43 | -0.39   | .69     |
| Matching condition × lipreading     | 1.95  | .62 | 3.14    | < .01   |
| Matching condition × working memory | 1.35  | .42 | 3.20    | < .01   |

All participants = 36.

*Note.* Formula: accuracy ~ mis/matching condition × lipreading + nonverbal IQ + mis/matching condition × working memory + (1 | subjects) + (1 | items).



**Table 23s.** Mismatching condition and CD group as reference levels.

*Fixed effects of GLMER model with CI, CD and LSE groups, mis/matching condition and lipreading as predictors of accuracy.*

| Parameter                      | Est.  | SE   | z-value | p-value |
|--------------------------------|-------|------|---------|---------|
| Intercept                      | 1.50  | .66  | 2.27    | < .05   |
| CI group                       | 0.31  | .83  | 0.38    | .70     |
| LSE group                      | -2.35 | .86  | -2.73   | < .01   |
| Matching condition             | 5.71  | 1.17 | 4.89    | < .001  |
| Lipreading                     | 0.63  | .35  | 1.77    | .08     |
| CI group × matching condition  | -2.78 | 1.18 | -2.36   | < .05   |
| LSE group × matching condition | -0.18 | 1.21 | -0.15   | .88     |

CI group = 13. CD group = 12. LSE group = 11.

*Note.* Formula: accuracy ~ groups × mis/matching condition + lipreading + (1 | subjects) + (1 | items).

**Table 24s.** Mismatching condition and CD group as reference levels.

*Fixed effects of GLMER model with CI, CD and LSE groups, mis/matching condition, lipreading, nonverbal IQ and working memory as predictors of accuracy.*

| Parameter          | Est.  | SE  | z-value | p-value |
|--------------------|-------|-----|---------|---------|
| Intercept          | 1.49  | .64 | 2.32    | < .05   |
| CI group           | 0.16  | .82 | 0.20    | .84     |
| LSE group          | -2.13 | .82 | -2.59   | < .01   |
| Matching condition | 4.56  | .55 | 8.30    | < .001  |
| Lipreading         | 0.62  | .36 | 1.72    | .08     |
| Nonverbal IQ       | -0.21 | .33 | -0.64   | .52     |
| Working memory     | 0.01  | .35 | 0.01    | 1.00    |

CI group = 13. CD group = 12. LSE group = 11.

*Note.* Formula: accuracy ~ groups + mis/matching condition + lipreading + nonverbal IQ + working memory + (1 | subjects) + (1 | items).

## Reaction Times

**Table 25s.** Mismatching condition as reference level.

*Fixed effects of GLMER model with all participants, mis/matching condition, lipreading, nonverbal IQ and working memory as predictors of reaction times (RTs).*

| Parameter          | Est.    | SE     | t-value |
|--------------------|---------|--------|---------|
| Intercept          | 2400.24 | 205.74 | 11.67   |
| Matching condition | 494.67  | 264.56 | 1.87    |
| Lipreading         | 75.71   | 156.47 | 0.48    |
| Nonverbal IQ       | 216.56  | 143.43 | 1.51    |
| Working memory     | 267.84  | 152.89 | 1.75    |

All participants = 36.

*Note.* Formula: RTs ~ mis/matching condition + lipreading + nonverbal IQ + working memory + (1 | subjects) + (1 | items).

**Table 26s.** Mismatching condition and CD group as reference levels.

*Fixed effects of GLMER model with CI, CD and LSE groups, mis/matching condition and lipreading as predictors of reaction times (RTs).*

| <b>Parameter</b>   | <b>Est.</b> | <b>SE</b> | <b>t-value</b> |
|--------------------|-------------|-----------|----------------|
| Intercept          | 2336.67     | 299.33    | 7.81           |
| CI group           | 210.05      | 366.38    | 0.57           |
| LSE group          | -6.33       | 387.67    | -0.02          |
| Matching condition | 473.92      | 265.11    | 1.79           |
| Lipreading         | 127.95      | 161.19    | 0.79           |

CI group = 13. CD group = 12. LSE group = 11.

*Note.* Formula: RTs ~ groups + mis/matching condition + lipreading + (1 | subjects) + (1 | items).

**Table 27s.** Mismatching condition and CD group as reference levels.

*Fixed effects of GLMER model with CI, CD and LSE groups, mis/matching condition, lipreading, nonverbal IQ and working memory as predictors of reaction times (RTs).*

| <b>Parameter</b>   | <b>Est.</b> | <b>SE</b> | <b>t-value</b> |
|--------------------|-------------|-----------|----------------|
| Intercept          | 2432.01     | 293.81    | 8.28           |
| CI group           | -11.39      | 367.77    | -0.03          |
| LSE group          | -89.53      | 375.08    | -0.24          |
| Matching condition | 488.98      | 265.39    | 1.84           |
| Lipreading         | 69.18       | 163.71    | 0.42           |
| Nonverbal IQ       | 214.01      | 153.39    | 1.39           |
| Working memory     | 269.13      | 160.23    | 1.68           |

CI group = 13. CD group = 12. LSE group = 11.

*Note.* Formula: RTs ~ groups + mis/matching condition + lipreading + nonverbal IQ + working memory + (1 | subjects) + (1 | items).
